# Supplementary material
Source: PubMed Central journal article supplement (PMC7217424)

## Supplemental material Table of Contents

|            |                                                                                                                                                      |
|------------|------------------------------------------------------------------------------------------------------------------------------------------------------|
| Figure S 1 | Gating strategy for flow cytometry of dissociated kidney cells                                                                                       |
| Figure S 2 | SerpineB2 and senescence markers in aged and stressed kidneys                                                                                        |
| Figure S 3 | Components of the plasminogen activation system and markers of kidney damage and fibrosis in aged and SerpineB2 <sup>-/-</sup> kidneys after UUO     |
| Figure S 4 | Markers of kidney damage and fibrosis in SerpineB2 <sup>-/-</sup> kidneys after IR                                                                   |
| Figure S 5 | Components of the plasminogen activation system, markers of renal function and kidney leukocyte content in SerpineB2 <sup>-/-</sup> kidneys after IR |
| Figure S 6 | CCL2 expression and BMDM attraction of PTEC from SerpineB2 <sup>-/-</sup> and wildtype kidneys and whole kidney CCL2 expression in UUO and IR        |
| Figure S 7 | CCL and CCR2 expression in BMDM and leukocyte counts after liposomal clodronate                                                                      |
| Figure S 8 | Markers of kidney damage and fibrosis in kidneys from bone marrow transplantation experiments                                                        |

**Figure S1** Gating strategy for flow cytometric analysis of dissociated kidney cells. Live leukocytes were identified by CD45 expression, LD marker exclusion and scatter properties. Among CD11b<sup>+</sup> myeloid cells, subsets were defined according to MHCII, F4/80 and CD206 expression.

**Figure S2** (A) Representative image of immunofluorescent staining for Ki67 and  $\gamma$ H2AX in control versus senescent primary tubular epithelial cells (PTEC). (B) Quantification of  $\gamma$ H2AX<sup>+</sup> and Ki67<sup>-</sup> PTEC as shown in (A), (n=3). (C) Representative immunohistochemical staining for SerpineB2 in young (8 weeks) versus old (2 years) mouse kidney. (D, E) Representative immunofluorescent staining for p21 and SerpineB2 and quantification (E) in young (8 weeks) versus old (2 years) mouse kidney, (n=6). (F, G) Representative immunofluorescent staining for p21 and SerpineB2 and quantification (G) in kidney of control versus unilateral ureteral obstruction (UUO), (n=5) (H, I) Representative immunofluorescent staining for Ki67

and SerpinB2 and quantification (I) in control versus UUO kidney, (n=5). Values are given as means  $\pm$ SEMs. Unpaired t-test two tailed. \* $P$ <0.05, \*\* $P$ <0.01, \*\*\*  $P$ <0.001.

**Figure S3** (A) Quantitative RT-PCR to quantify tPA, uPA, uPAR, Pai-1 and Mmp2 in kidneys from old WT and KO mice, (n=6). (B) uPA activity in kidney lysates from old WT and KO mice, (n=4). (C-E) Quantitative RT-PCR of neutrophil gelatinase-associated lipocalin (Ngal), fibronectin (Fn1) and  $\alpha$  smooth muscle actin ( $\alpha$ Sma) mRNA in kidneys from WT and KO mice at 14 days (C), 3 days (D) and 7days (E) post UUO, (n=5). (F) Quantitative RT PCR to quantify tPA, uPA, uPAR , Pai-1 and Mmp2 in kidney from WT and KO mice at 14 days post UUO (n=6). (G) uPA activity in kidney lysates from old WT and KO mice at 14 days post UUO, (n=4). Wildtype = WT, SerpinB2<sup>-/-</sup> = KO. Values are given as means  $\pm$ SEMs. Unpaired t-test two tailed. \* $P$ <0.05, \*\* $P$ <0.01, \*\*\*  $P$ <0.001.

**Figure S4** (A-C) Quantitative RT-PCR of neutrophil gelatinase-associated lipocalin (Ngal), fibronectin (Fn1) and  $\alpha$  smooth muscle actin ( $\alpha$ Sma) mRNA in kidneys from WT and KO mice at 3 (A), 7 (B) and 14 days (C) post unilateral IR, (n=5). (D, E) Representative images of picosirius red (PRed) and immunofluorescent staining for FN1 and  $\alpha$ SMA and quantification (E) in kidney sections from WT and KO mice at 14 days post unilateral IR, (n=5). Original magnification X 200 in D. Wildtype = WT, SerpinB2<sup>-/-</sup> = KO. Values are given as means  $\pm$ SEMs. Unpaired t-test two tailed. \* $P$ <0.05, \*\* $P$ <0.01, \*\*\*  $P$ <0.001.

**Figure S5** (A, B) Serum creatinine and serum urea measurements in WT and KO mice at indicated time points post bilateral ischemia reperfusion (IR) (n=4). (C-F) Flow cytometry for total CD45<sup>+</sup> live leucocytes (C), total macrophages (CD11b<sup>+</sup>-F4/80<sup>high</sup>) (D), M1-type (F4/80<sup>+</sup>-MHCII<sup>high</sup>) (E) and M2-type macrophages (CD11b<sup>+</sup>-CD206<sup>high</sup>) (F) in kidneys from WT and KO mice at indicated time points post IR,

(n=5). (G) Quantitative RT PCR to quantify tPA, uPA, uPAR, Pai-1 and Mmp2 in kidneys from old WT and KO mice post IR (n=3). Unpaired t-test two tailed. Wildtype = WT, SerpinB2<sup>-/-</sup> = KO. Values are given as means ±SEMs. \*P<0.05, \*\*P<0.01, \*\*\*P<0.001.

**Figure S6** Quantitative RT-PCR of Ccl2 mRNA in phorbol 12-myristate 13-acetate (PMA) treated primary tubular epithelial cells (PTEC) from WT and KO (n=3). (B) ELISA quantification of CCL2 in PMA treated PTEC from WT and KO mice. (C) Quantitative RT-PCR of Ccl2 in control or Ccl2 siRNA treated PTEC (n=3). (D) Quantification of invading bone marrow derived macrophages (BMDM) in co-culture experiment with WT BMDM in upper chamber and control or Ccl2 siRNA treated PTEC in lower chamber, (n=4). (E, F) ELISA quantification of CCL2 in kidney homogenates from WT and KO mice post UUO or IR at 3, 7 and 14 days. Wildtype = WT, SerpinB2<sup>-/-</sup> = KO. Values are given as means ±SEMs (n=4 for each data point). Two-way ANOVA with Bonferroni's multiple comparison test. \*P<0.05, \*\*P<0.01, \*\*\*P<0.001.

**Figure S7** (A) Quantitative RT-PCR of Ccl2 and its receptor Ccr2 mRNA in bone marrow derived macrophages (BMDM) from WT and KO mice. (B, C) Flow cytometry for total intrarenal live leucocytes and M1-type -F4/80<sup>+</sup>MHCII<sup>high</sup> macrophages, normalized to the mean of WT unilateral ureteral obstruction (UUO) kidney from vehicle injected mice. Kidneys from WT and KO mice injected with liposomal clodronate (LC) are compared to kidneys from vehicle (Veh) injected mice. Wildtype = WT, SerpinB2<sup>-/-</sup> = KO. Values are given as means ±SEMs (n=4 for each data point). Two-way ANOVA with Bonferroni's multiple comparison test. \*P<0.05, \*\*P<0.01, \*\*\*P<0.001.

**Figure S8** (A, B) Quantification and representative images for picosirius red (PRed) and immunofluorescence for fibronectin (FN1) and  $\alpha$  smooth muscle actin ( $\alpha$ SMA) in kidneys from bone marrow transplantation experiment from 4 separate groups (WT Kid-WT BM), (KO Kid-WT BM), (WT Kid-KO BM) and (KO Kid-KO BM). Original magnifications X 200. Wildtype = WT, SerpinB2<sup>-/-</sup> = KO. Values are given as means  $\pm$ SEMs. Two-way ANOVA with Bonferroni's multiple comparison test. \* $P$ <0.05, \*\* $P$ <0.01, \*\*\*  $P$ <0.001

FigS1

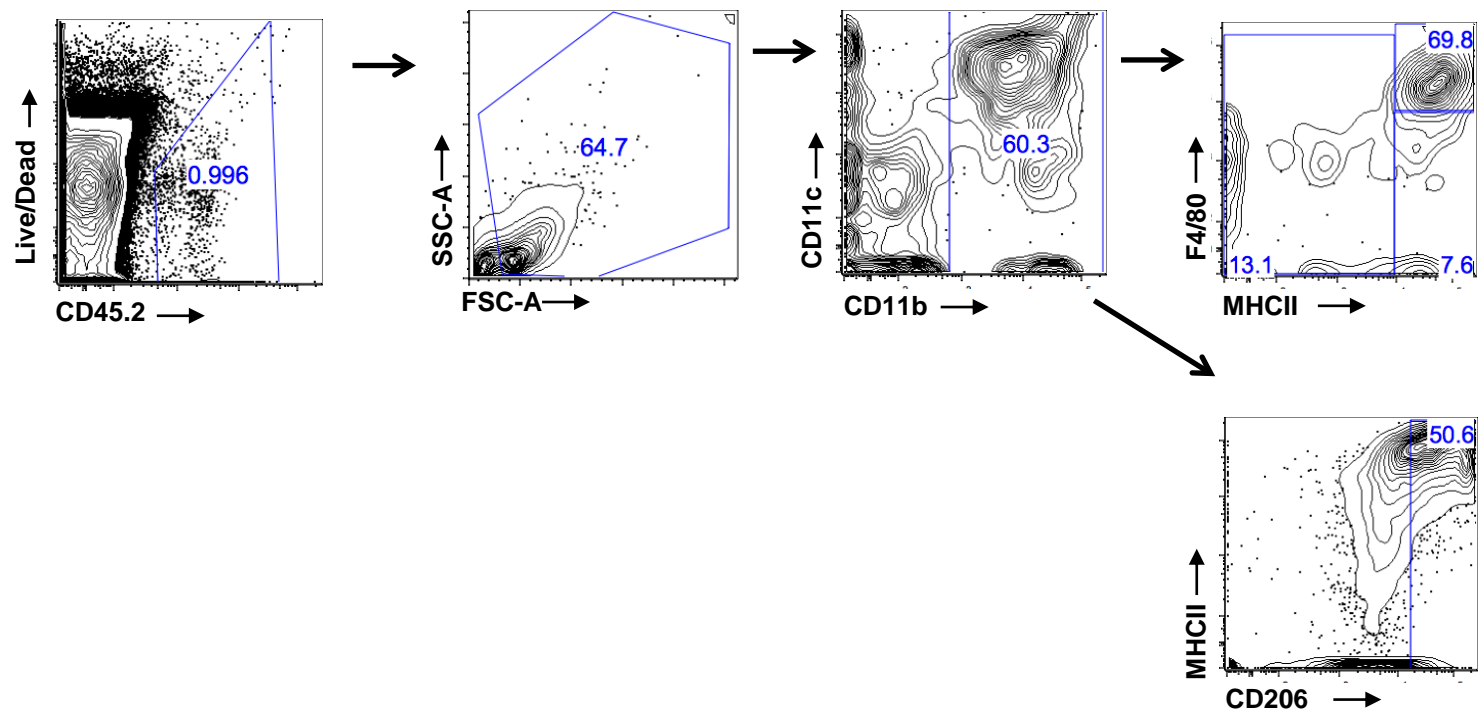

**FigS2**

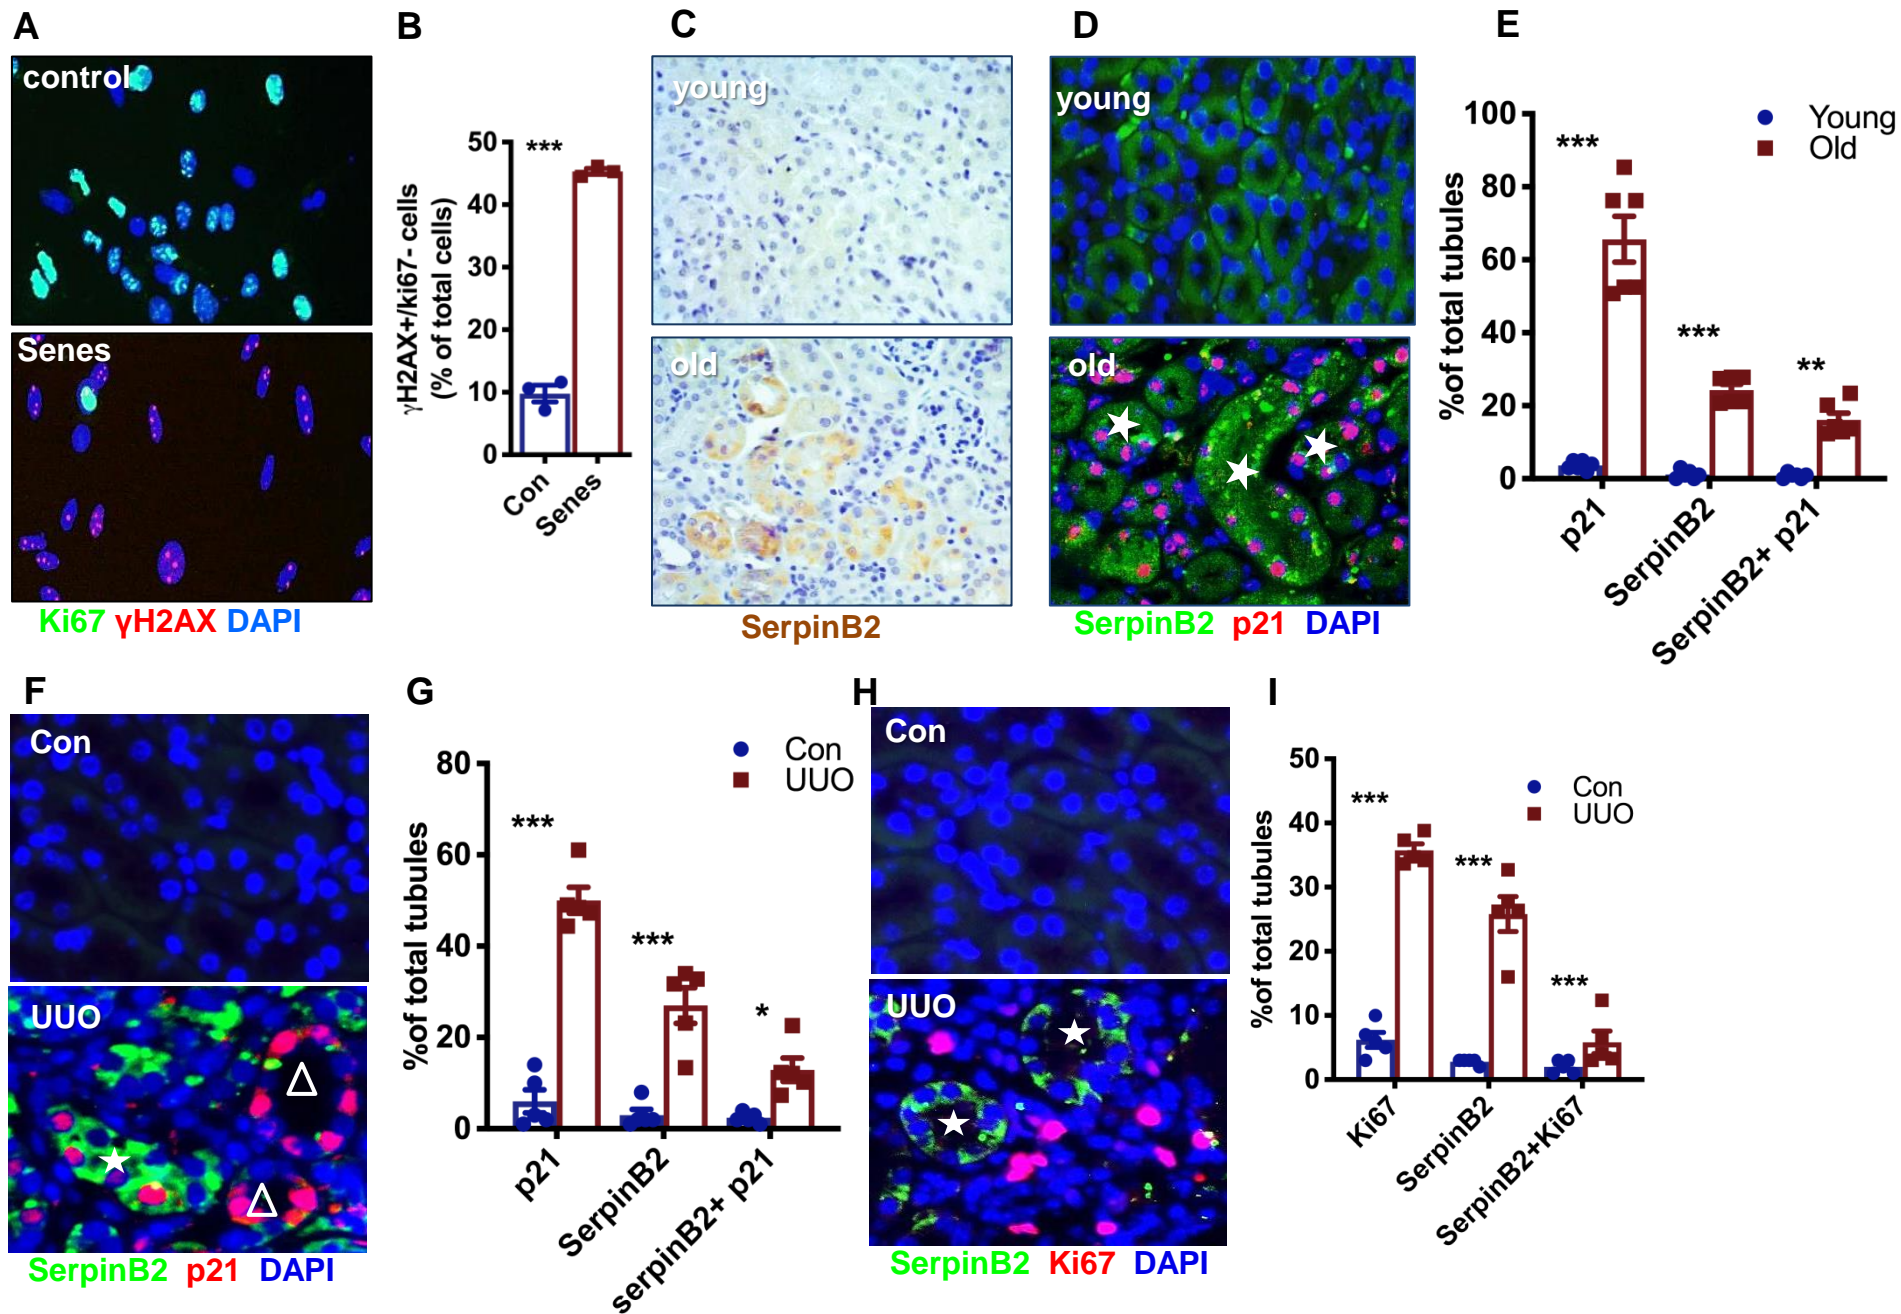

**FigS3**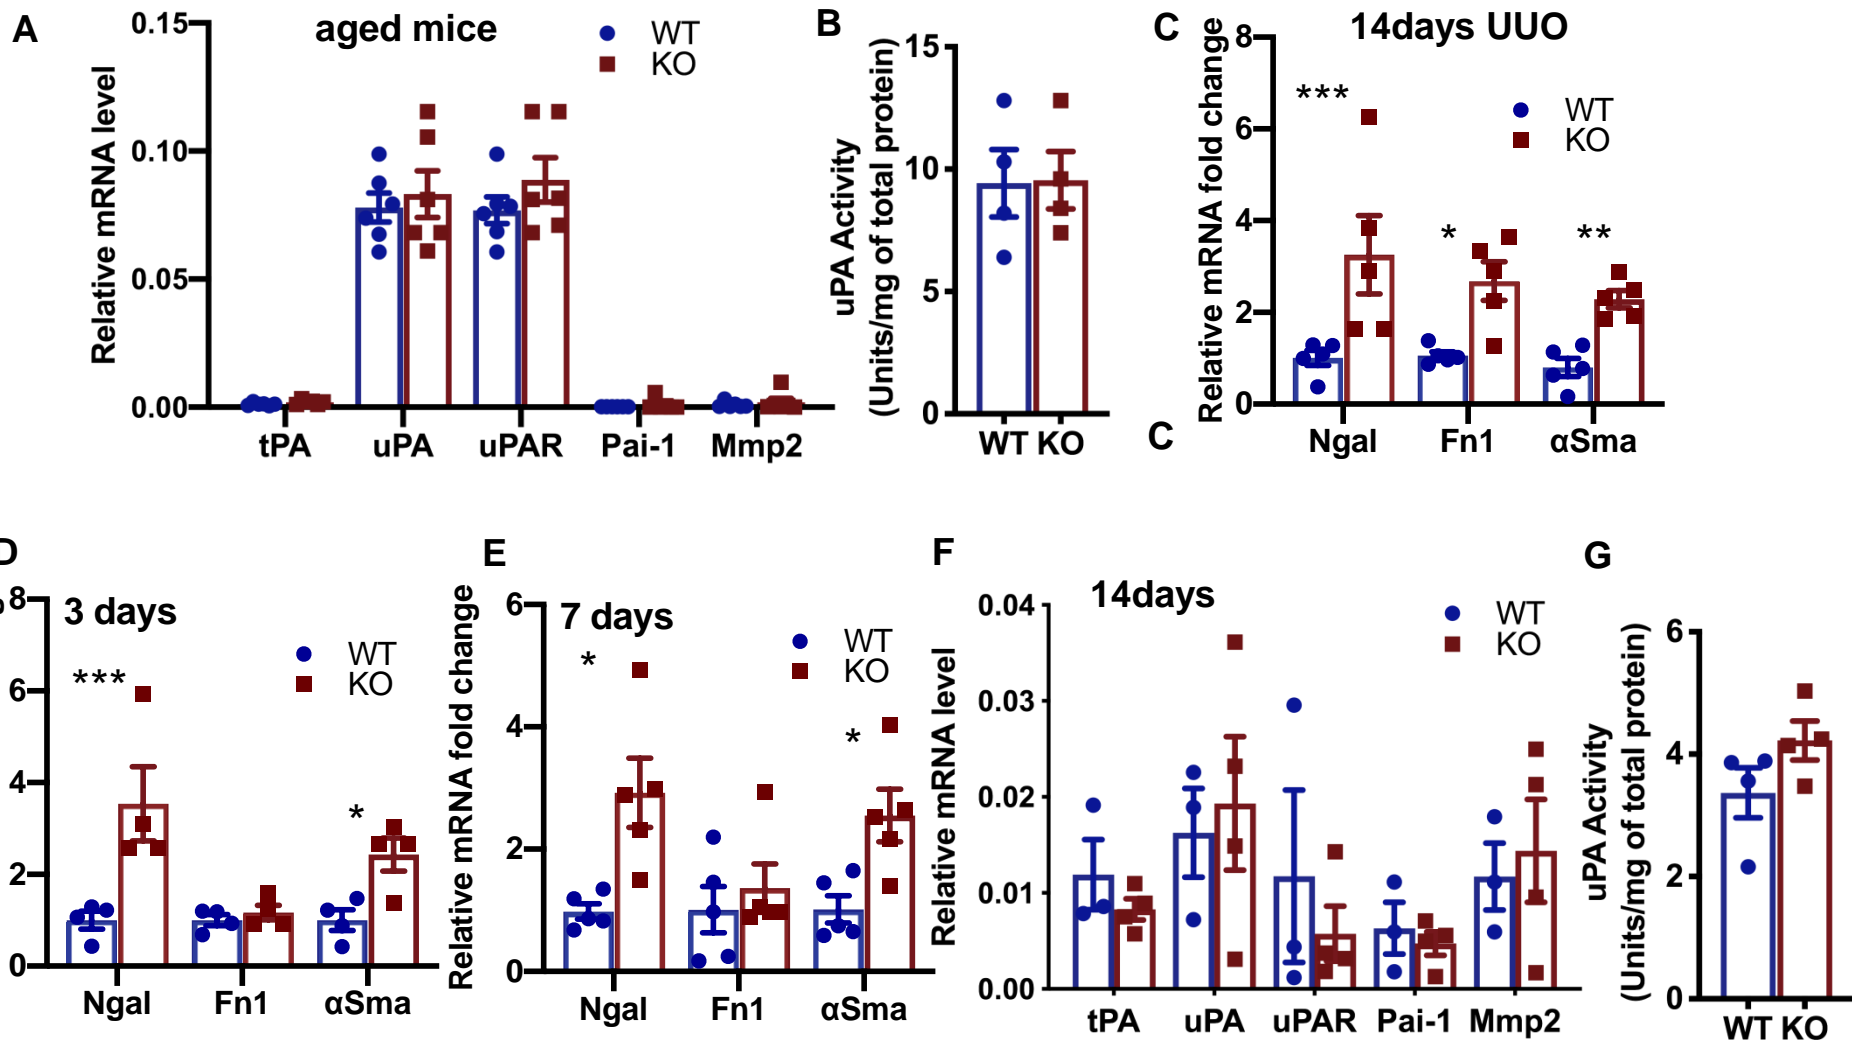

FigS4

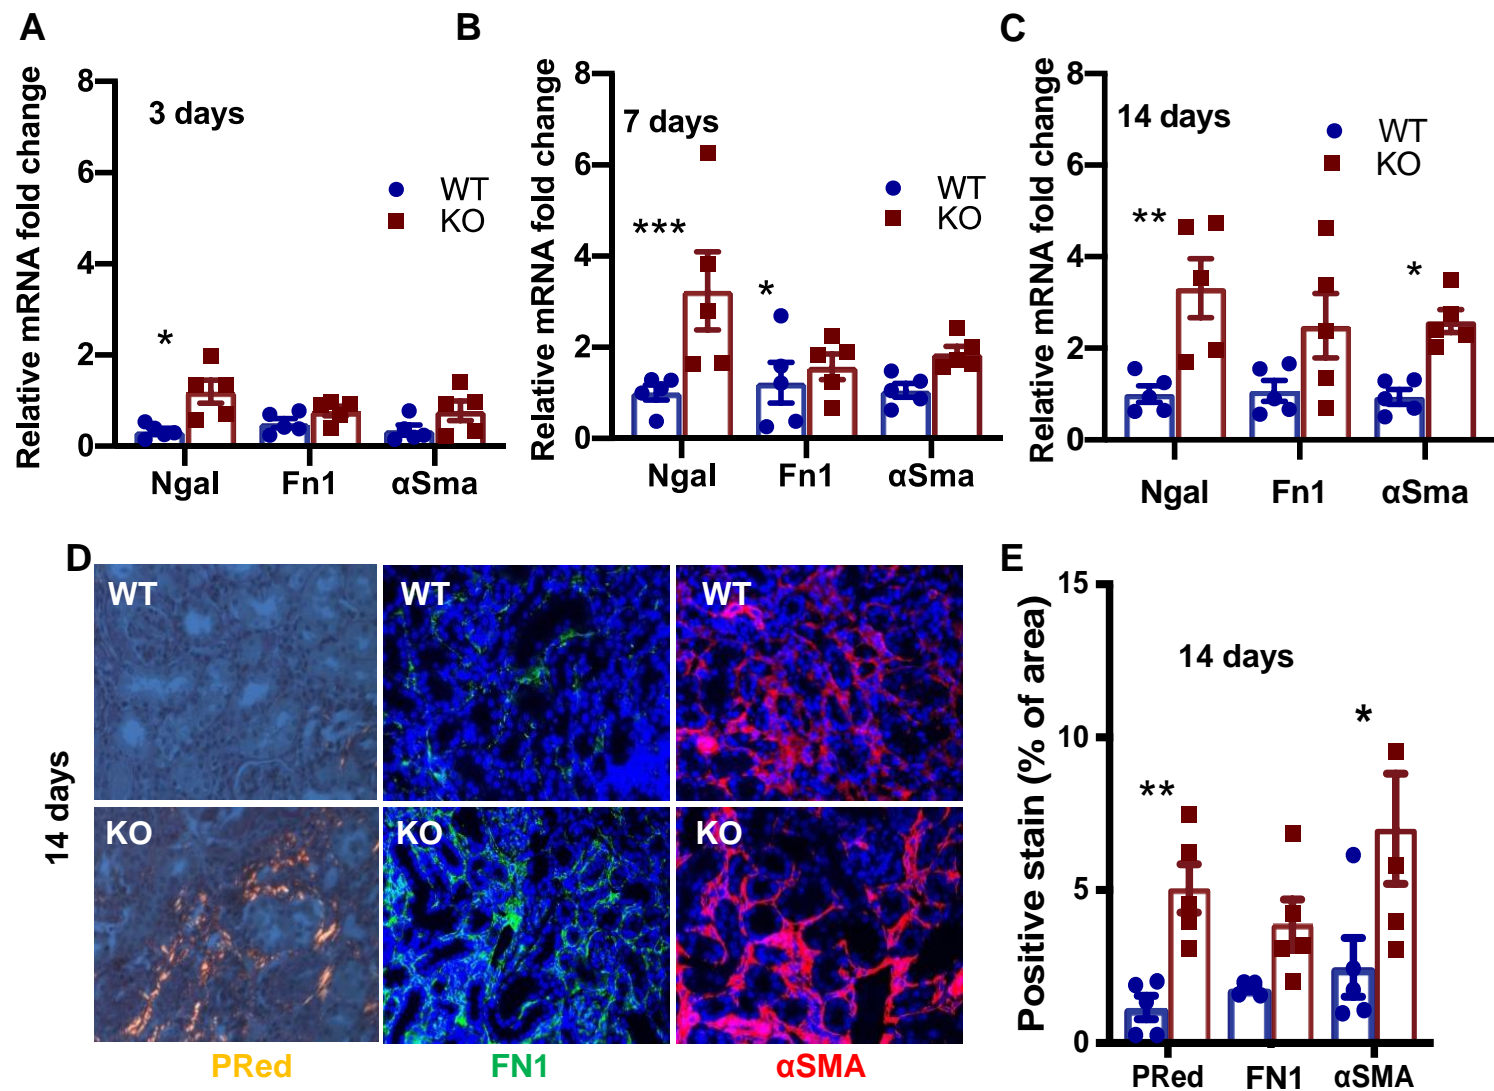



**FigS5**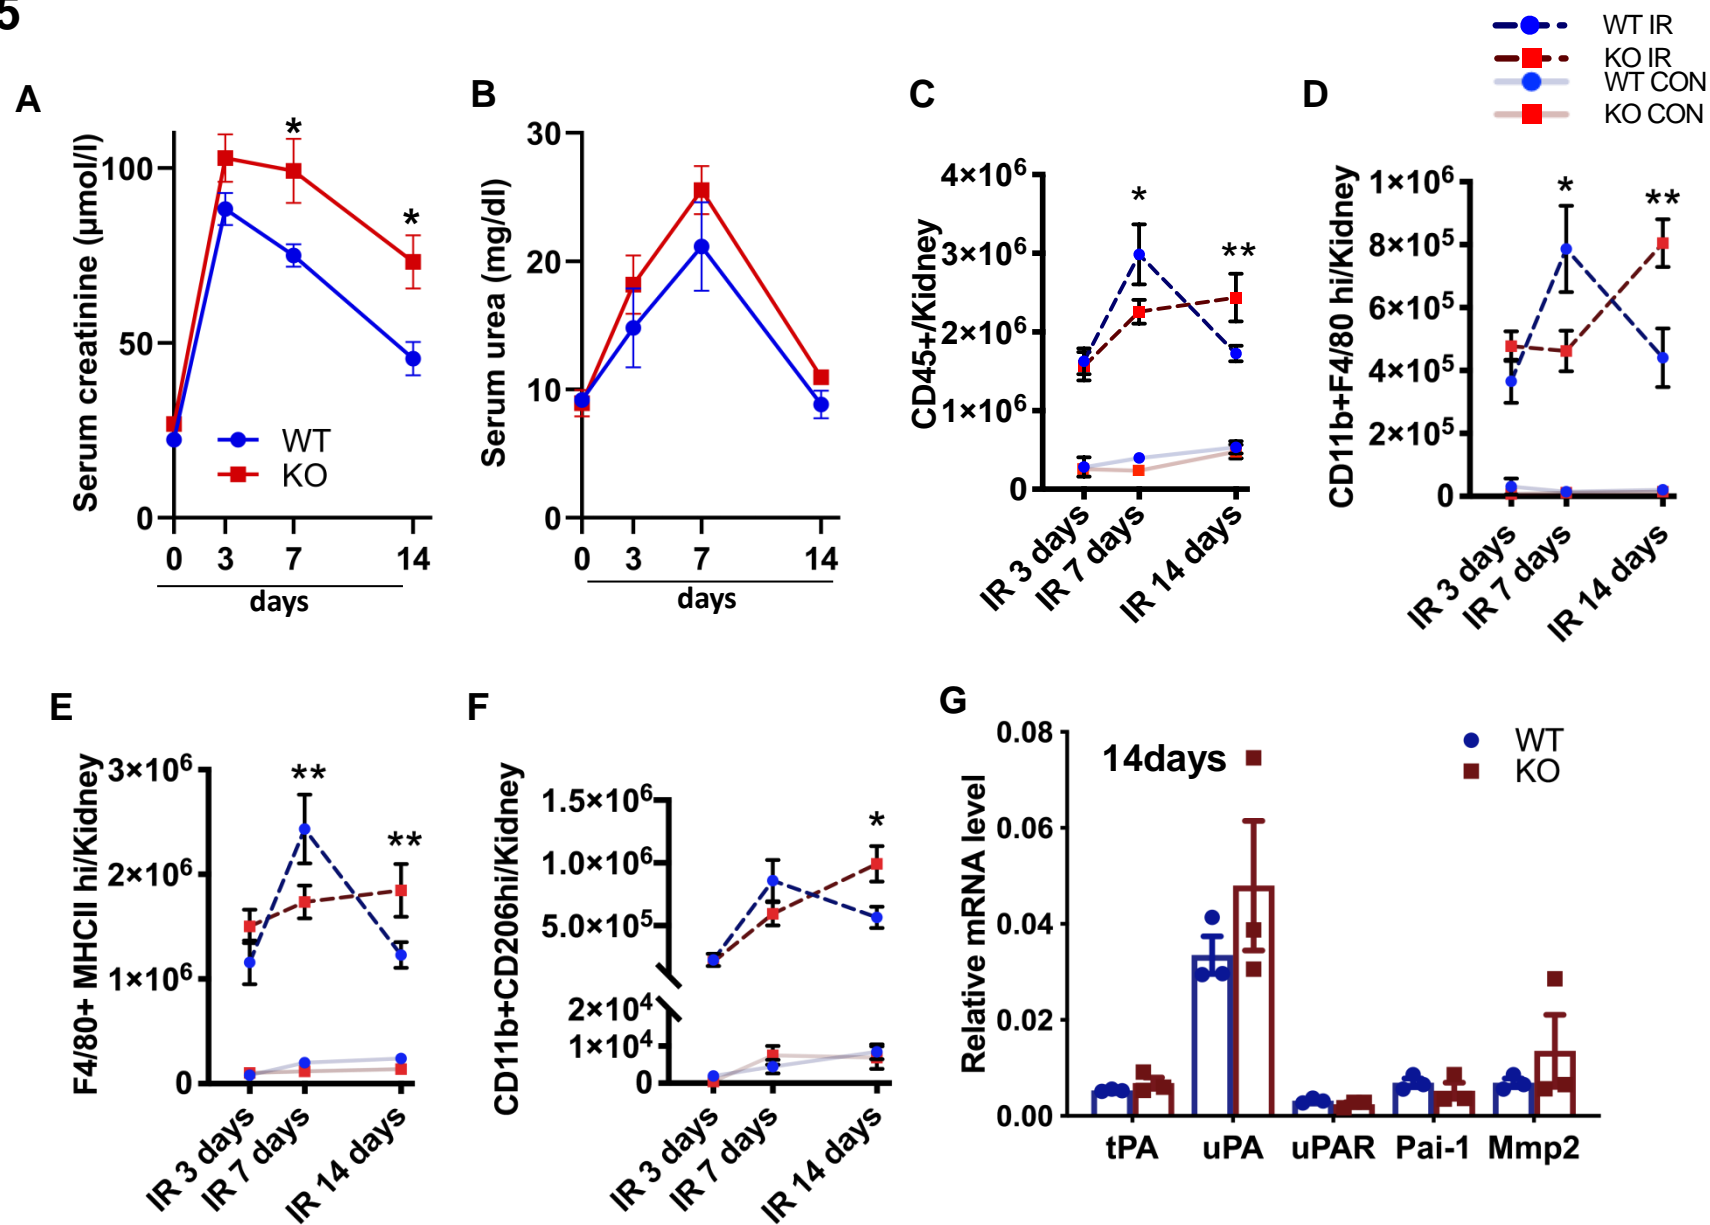

FigS6

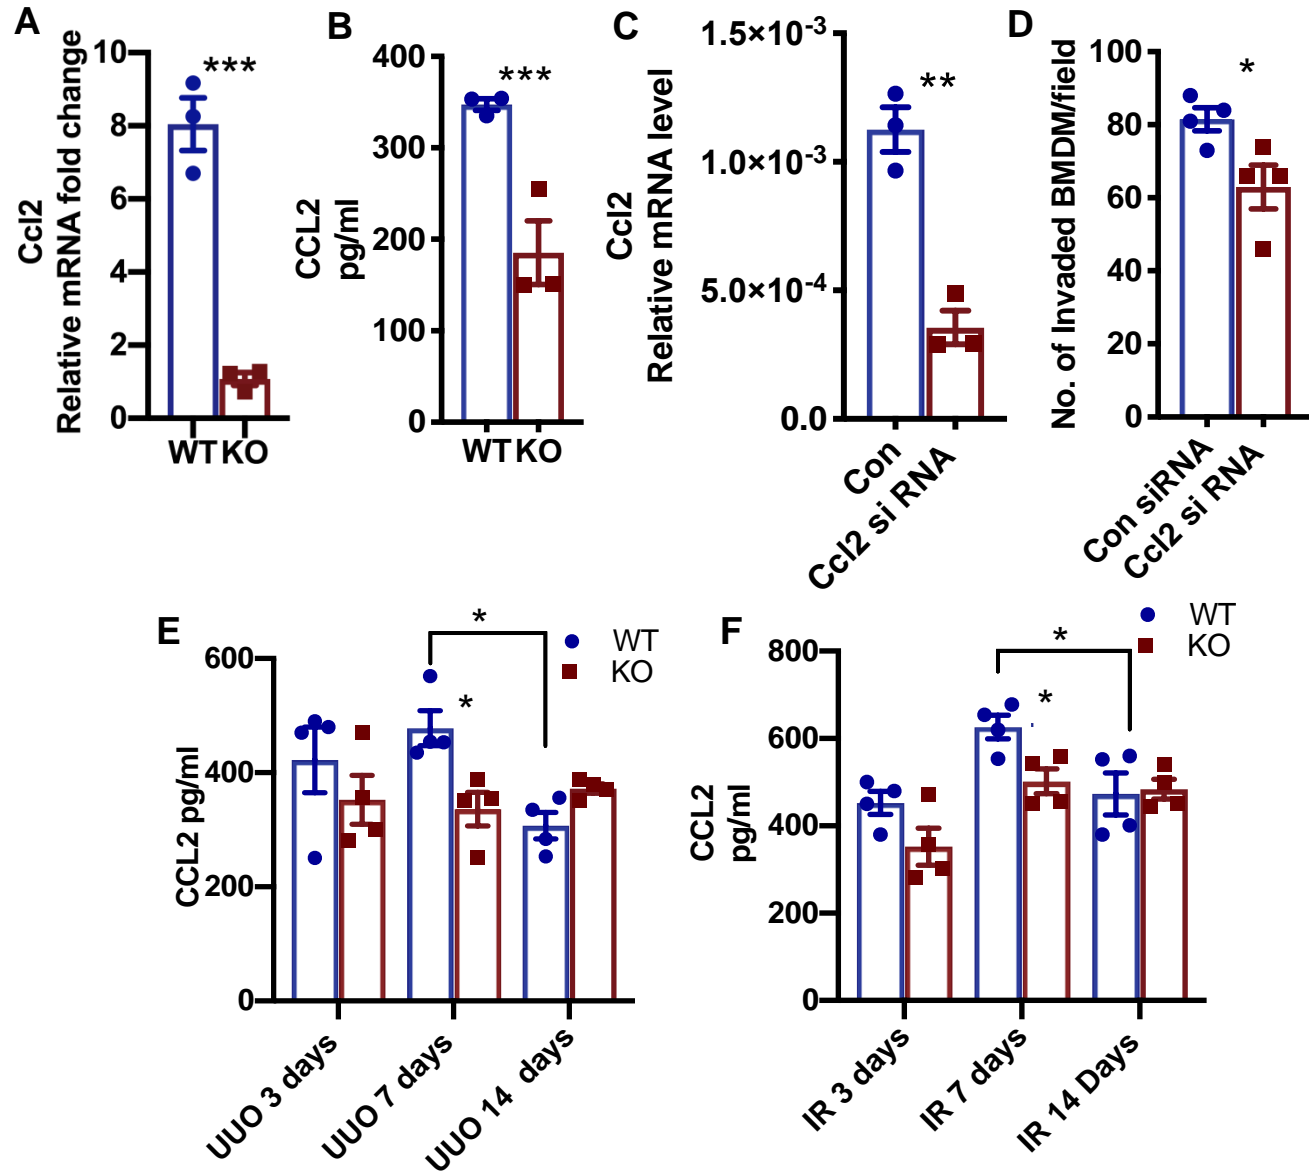

**FigS7**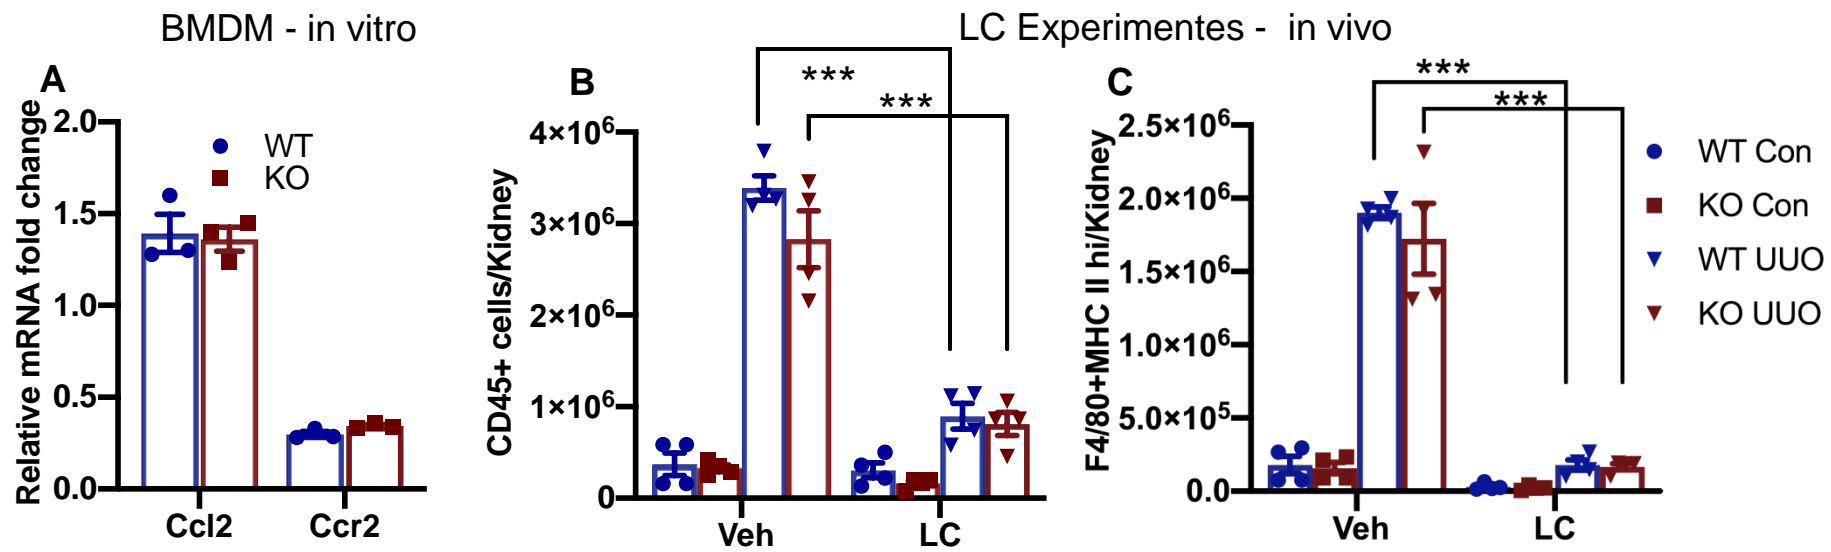

FigS8

A

- WT Kid-WT BM
- ▼ KO Kid-WT BM
- ▲ WT Kid-KO BM
- KO Kid-KO BM

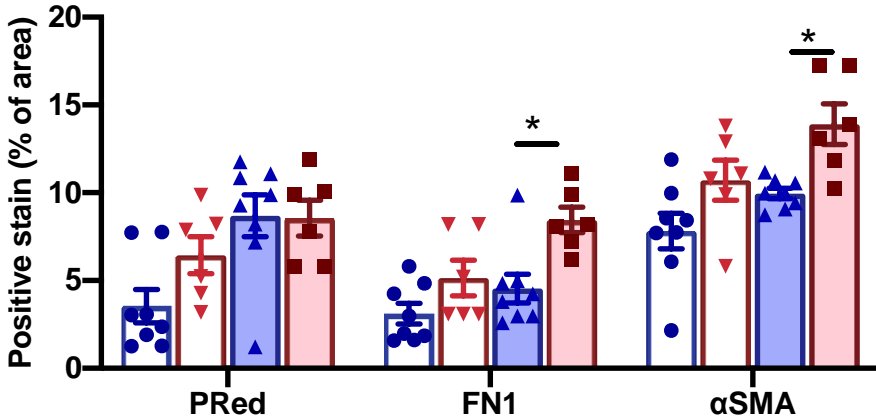

B

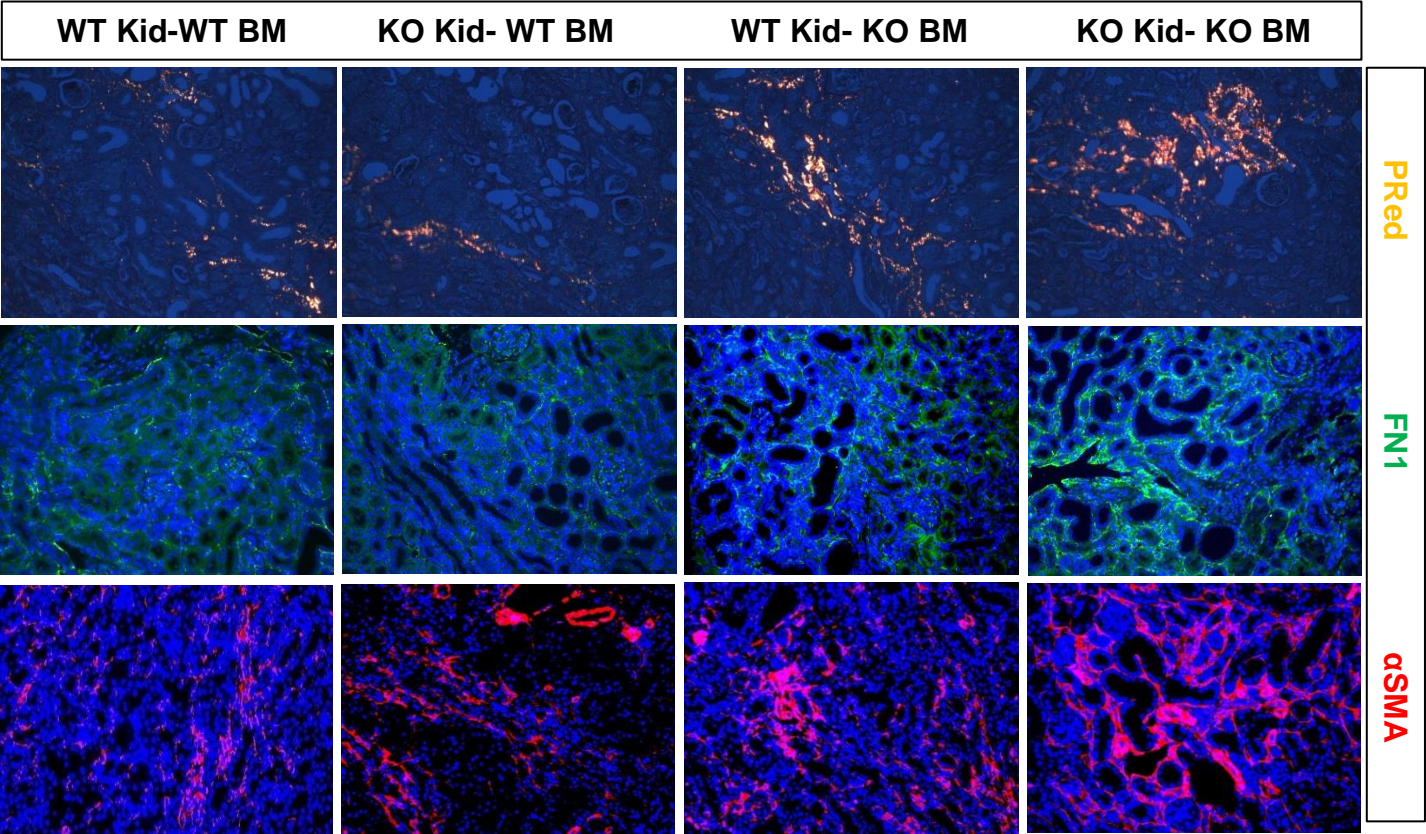

Supplement: ASN.2019101085SupplementaryData.pdf [file ASN.2019101085SupplementaryData.pdf]
